# Supplementary material for: Water movement through plant roots – exact solutions of the water flow equation in roots with linear or exponential piecewise hydraulic properties
Source: Copernicus journal article supplement (doi:10.5194/hess-21-6519-2017), 2017-12-21
Supplement: Supplementary file 1 [file hess-21-6519-2017-supplement.zip]

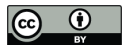

## *Supplement of*

# **Water movement through plant roots – exact solutions of the water flow equation in roots with linear or exponential piecewise hydraulic properties**

**Félicien Meunier et al.**

*Correspondence to:* Félicien Meunier ([felicien.meunier@gmail.com](mailto:felicien.meunier@gmail.com))

- [hess-21-6519-2017-supplement-title-page.pdf](#)
- [movie\\_veloci.avi](#)

The copyright of individual parts of the supplement might differ from the CC BY 3.0 License.
